# Supplementary material for: How chemical cross-linking and entanglements in polybutadiene elastomers cope with tearing
Source: Royal Society of Chemistry journal article supplement (doi:10.1039/d3cp01398g), 2023-01-01
Supplement: d3cp01398g1.pdf [file d3cp01398g1.pdf]

How chemical cross-linking and entanglements in polybutadiene  
elastomers cope with tearing

Xiangliang Zeng<sup>1</sup>, Xinnian Xia<sup>1\*</sup>, JianFeng Fan<sup>2</sup>, Rong Sun<sup>2</sup>, Xiaoliang Zeng<sup>2\*</sup>

<sup>1</sup> *College of Chemistry and Chemical Engineering, Hunan University, Lushan South Road, Yuelu  
District, Changsha 410082, China*

<sup>2</sup> *Shenzhen Institute of Advanced Electronic Materials, Shenzhen Institutes of Advanced Technology,  
Chinese Academy of Sciences, Shenzhen 518055, China*

\*Corresponding authors: [xnxia@hnu.edu.cn](mailto:xnxia@hnu.edu.cn), [xl.zeng@siat.ac.cn](mailto:xl.zeng@siat.ac.cn)

## EXPERIMENTAL

**Materials:** Both-end hydroxyl group-terminated hydrogenated polybutadiene (BHH-PB) (GI2000, molecular weight,  $M_n \sim 2000$ ) was obtained from Nippon Soda Co., Ltd., polybutadiene adducted with maleic anhydride (PAMA) (Ricon 130MA8, number average molecular weight,  $M_n \sim 3100$ ) was purchased from Cray Valley Chemical Co., Ltd. Hexamethylene diisocyanate (HDI), dibutyltin dilaurate (DBTDL), pentaerythritol tetrakis 3-(3,5-ditert-butyl-4-hydroxyphenyl)propionate (RALOX 630), and dichloromethane were obtained from Aladdin Inc. All materials were used as received without further processing.

### *Methods*

**B-H-P elastomers.** BHH-PB (1.1 eq. of -OH), HDI (1 eq. of -NCO), DBTDL (0.005 eq. of -NCO), and 5 mL dichloromethane were added to a flask, the mixture was stirred for 3 h at 25 °C to form intermediate product (B-H). Subsequently, PAMA (0.25 g, 0.5 g, 0.75 g, 1 g) and RALOX 630 (1 wt%) was added to the flask, followed by pouring the mixture into a Teflon mold. The mixture was cured for 2 h at 150 °C to obtain the B-H-P elastomers.

**Optical images.** The optical images were obtained with an iPhone.

**Tensile and tear test.** Mechanical tensile-stress experiments were carried out by a SUNS UTM4000 instrument at room temperature (25 °C) with a displacement rate of 10 mm min<sup>-1</sup>. The tear test is to control the crack speed at 0.017 mm s<sup>-1</sup>, 0.067 mm s<sup>-1</sup>, 0.25 mm s<sup>-1</sup>, 0.83 mm s<sup>-1</sup>, and 2.5 mm s<sup>-1</sup>.

**Dynamic mechanical analysis.** Dynamic mechanical analysis was performed on a TA

Instruments RSA-G2 Solids Analyzer. Samples were cut into square for characterization. For stretching cycle tests, a  $0.83 \text{ mm s}^{-1}$  speed was applied on the samples to stretch to 100%, and then keep the speed  $0.83 \text{ mm s}^{-1}$  to 0%.

***Rheology test.*** The dynamic viscoelasticity of the samples was measured by an Anton Paar model MCR-302 rheometer. The samples were placed under a 25 mm diameter parallel plate. In the frequency sweep tests, the angular frequency ( $\omega$ ) was from 100 to  $0.01 \text{ rad s}^{-1}$  at  $25 \text{ }^\circ\text{C}$  with the shear strain ( $\gamma$ ) of 1%.

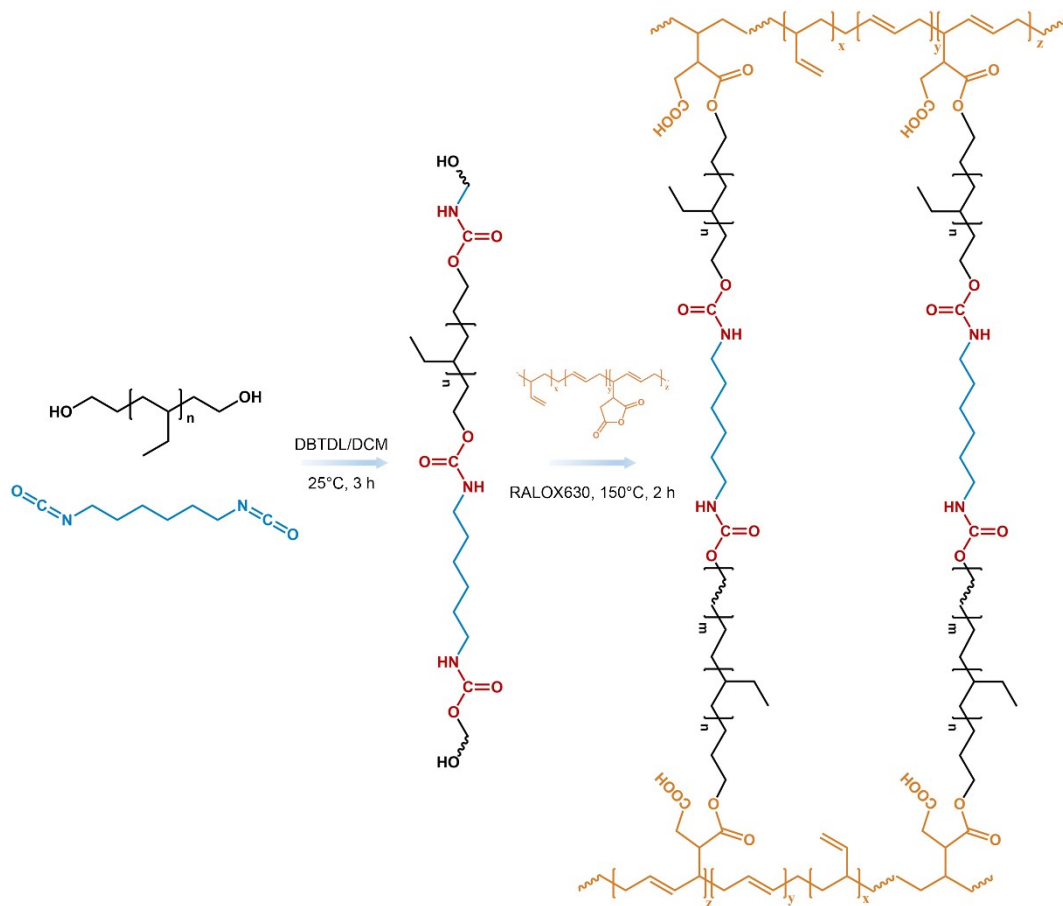

**Fig. S1 Chemical reaction flow diagram for the preparation of B-H-P<sub>x</sub> elastomers.**

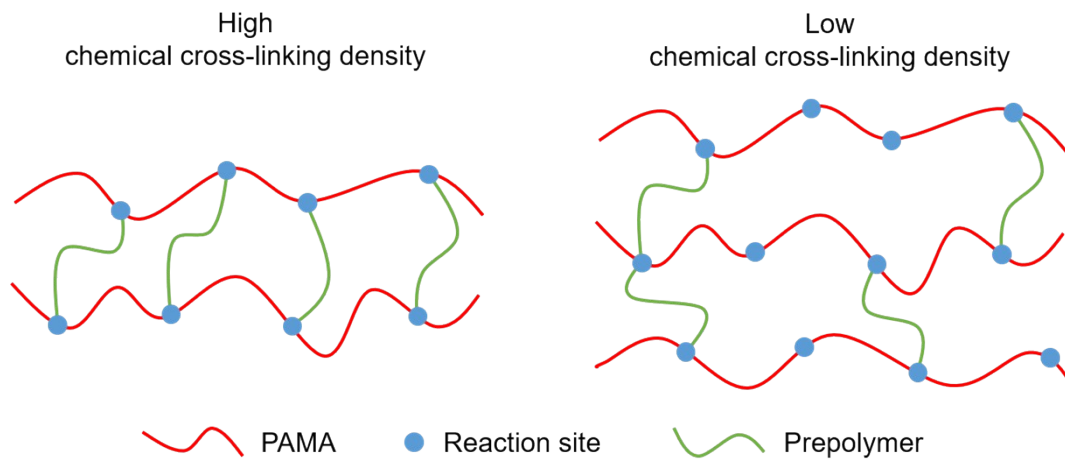

**Fig. S2 Schematic diagram of branch points affect the chemical cross-linking density of elastomers.**

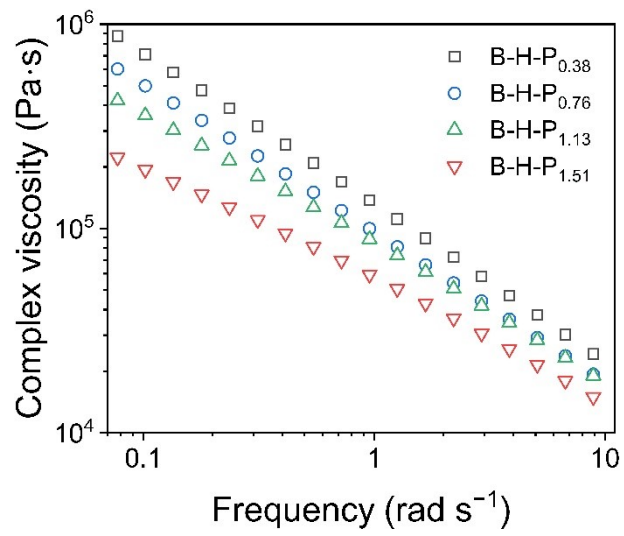

**Fig. S3 Complex viscosity of fabricated elastomers.**

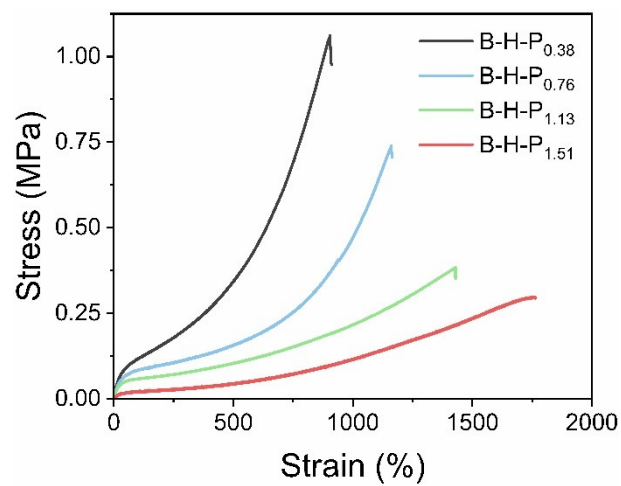

**Fig. S4** Stress-strain curves for B-H-P<sub>x</sub> elastomers.

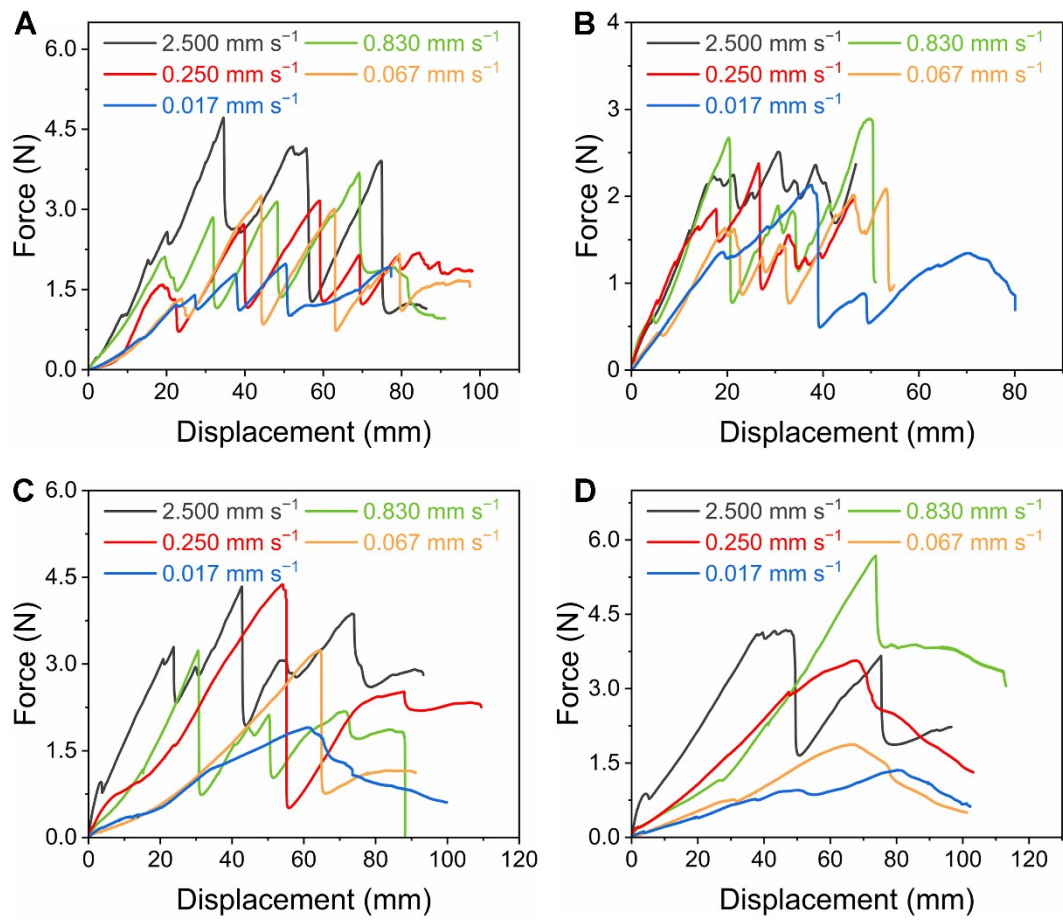

**Fig. S5 Force-displacement curves. A** B-H-P<sub>0.38</sub>, **B** B-H-P<sub>0.76</sub>, **C** B-H-P<sub>1.13</sub>, and **D** B-H-P<sub>1.51</sub> elastomers.



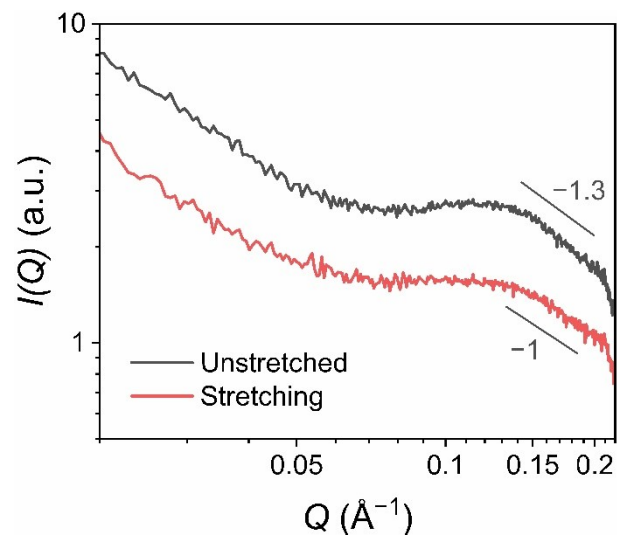

**Fig. S6 Small-angle X-ray scattering of B-H-P<sub>1.51</sub> elastomer.**

**Table S1 The chemical cross-linking density of the elastomers.**

| Elastomer                                                        | B-H-P <sub>0.38</sub> | B-H-P <sub>0.76</sub> | B-H-P <sub>1.13</sub> | B-H-P <sub>1.51</sub> |
|------------------------------------------------------------------|-----------------------|-----------------------|-----------------------|-----------------------|
| Crosslinking density<br>(10 <sup>-4</sup> mol ml <sup>-1</sup> ) | 56.205                | 48.463                | 40.285                | 30.171                |

**Table S2 The calculated molecular weight between two cross-linkers and molecular weight between two entanglement points of the elastomers.**

| Elastomer                                                               | B-H-P <sub>0.38</sub> | B-H-P <sub>0.76</sub> | B-H-P <sub>1.13</sub> | B-H-P <sub>1.51</sub> |
|-------------------------------------------------------------------------|-----------------------|-----------------------|-----------------------|-----------------------|
| Molecular weight between two cross-linkers (g mol <sup>-1</sup> )       | 344492                | 400390                | 646175                | 959195                |
| Molecular weight between two entanglement points (g mol <sup>-1</sup> ) | 27637                 | 32957                 | 46695                 | 148305                |
